# Supplementary material for: Decrease in the Ratio proBDNF/BDNF in the Urine of Aging Female Patients with OAB
Source: MDPI journal article supplement (doi:10.3390/metabo13060723), 2023-06-03
Supplement: s1 [file s1]

Figure S1: Flow diagram underlying the study selection process.

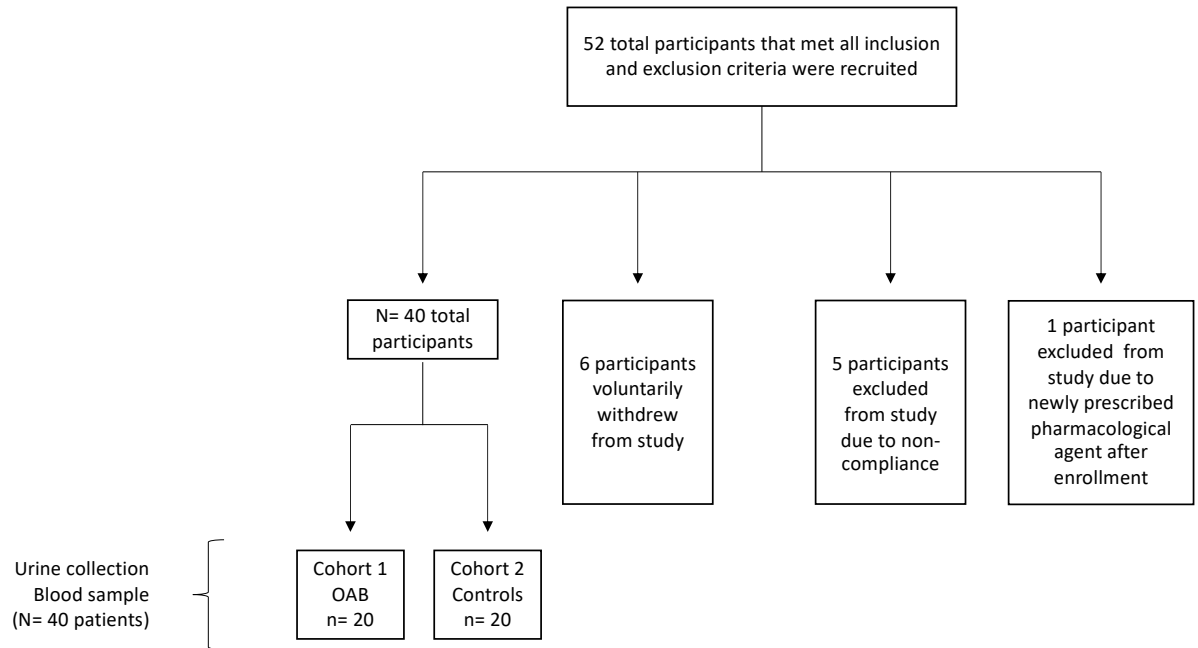

Table S1: qPCR miRNA information.

|                    | Sequence accession number |
|--------------------|---------------------------|
| <b>miR-26b-5p</b>  | MIMAT0000083              |
| <b>miR-26a-5p</b>  | MIMAT0000082              |
| <b>miR-10a-5p</b>  | MIMAT0000253              |
| <b>miR-491-5p</b>  | MIMAT0002807              |
| <b>miR-103a-3p</b> | MIMAT0009196              |
| <b>miR-15b-5p</b>  | MIMAT0000417              |
| <b>miR-142-3p</b>  | MIMAT0000433              |
| <b>miR-202-3p</b>  | MIMAT0002810              |
| <b>miR-124-5p</b>  | MIMAT0004591              |
| <b>miR-152-5p</b>  | MIMAT0026479              |
| <b>snU6</b>        | NR 004394.1               |

Table S2: Primer sequences used for qPCR

|                         | primers                       |
|-------------------------|-------------------------------|
| <b>miR-26b-5p</b>       | ACACTCCAGCTGGGTTCAAGTAATTCAGG |
| <b>miR-26a-5p</b>       | ACACTCCAGCTGGGTTCAAGTAATCCAGG |
| <b>miR-10a-5p</b>       | ACACTCCAGCTGGGTACCCTGTAGATCCG |
| <b>miR-491-5p</b>       | ACACTCCAGCTGGGAGTGGGGAACCCT   |
| <b>miR-103a-3p</b>      | ACACTCCAGCTGGGAGCAGCATTGTACAG |
| <b>miR-15b-5p</b>       | ACACTCCAGCTGGGTAGCAGCACATCATG |
| <b>miR-142-3p</b>       | ACACTCCAGCTGGGCATAAAGTAGAAAGC |
| <b>miR-202-3p</b>       | ACACTCCAGCTGGGAGAGGTATAGGGCAT |
| <b>miR-124-5p</b>       | ACACTCCAGCTGGGCGTGTTACAGCGGA  |
| <b>miR-152-5p</b>       | ACACTCCAGCTGGGCATAAAGTAGAAAGC |
| <b>universal primer</b> | CTCACAGTACGTTGGTATCCTTGTG     |
| <b>snU6 forward</b>     | CTCGCTTCGGCAGCACATATACT       |
| <b>snU6 reverse</b>     | ACGCTTCACGAATTTGCGTGTC        |

Table S3: Correlation between miR-491-5p and p75<sup>ECD</sup> with symptom questionnaires' scores and voiding diary parameters:

| miRNA                    | Variables | Correlation coefficient (r) | p value       |
|--------------------------|-----------|-----------------------------|---------------|
| miR-491-5p <sup>\$</sup> | OABSS     | -0.405                      | <b>0.011</b>  |
|                          | ICIQ-SF   | -0.379                      | <b>0.019</b>  |
|                          | IIQ-7     | -0.494                      | <b>0.001</b>  |
| p75 <sup>ECD</sup>       | OABSS     | -0.372                      | <b>0.018</b>  |
|                          | ICIQ-SF   | -0.539                      | <b>0.0001</b> |
|                          | IIQ-7     | -0.372                      | <b>0.018</b>  |

The p value for Spearman correlation, only p <0.05 are reported as considered statistically significant.

<sup>\$</sup> Data on miR-491-5p were published in Metabolites (same special issue), Cammisotto et al (2022).
